# Supplementary material for: Identification of zinc finger protein Bcl6 as a novel regulator of early adipose commitment
Source: PubMed Central journal article supplement (PMC4929941; doi:10.1098/rsob.160065), 2016-06-01
Supplement: rsob160065supp1.pdf [file rsob160065supp1.pdf]

## **Supplementary material**

### **Identification of zinc finger protein Bcl6 as a novel regulator of early adipose commitment**

Xiaoming Hu <sup>1,3</sup>, Yuanfei Zhou <sup>1</sup>, Yang Yang <sup>1</sup>, Jie Peng <sup>1</sup>, Tongxing Song <sup>1</sup>, Tao Xu <sup>1</sup>, Hongkui Wei <sup>1</sup>, Jian Peng <sup>1,3,\*</sup>, Siwen Jiang <sup>2,3</sup>

<sup>1</sup>Department of Animal Nutrition and Feed Science, College of Animal Science and Technology, Huazhong Agricultural University, Wuhan 430070, People's Republic of China

<sup>2</sup>Key Laboratory of Animal Genetics, Breeding and Reproduction of Ministry of Education, College of Animal Science and Technology, Huazhong Agricultural University, Wuhan, 430070, People's Republic of China

<sup>3</sup>The Cooperative Innovation Center for Sustainable Pig Production, Wuhan 430070, People's Republic of China

\*Corresponding authors at: Department of Animal Nutrition and Feed Science, College of Animal Science and Technology, Huazhong Agricultural University, Wuhan 430070, People's Republic of China. Tel.: +86 27 87280122, fax: +86 27 87281378 (J. Peng). E-mail: pengjian@mail.hzau.edu.cn (J.P.).

## **Supplementary material Materials and Methods**

### **Mice**

The tissue samples for gene expression assay obtained from 1-week-old and 8-week-old mice (129 /ICR background). Eight-week-old Kunming mice were fed either a control diet (D12450B; 20% protein, 70% carbohydrate, and 10% fat) or a high fat diet (HFD) (D12451; 20% protein, 35% carbohydrate, and 45% fat) for 8 weeks (Research Diets Inc.). All the experimental procedures were approved by the Hubei Committee on Laboratory Animal Care.

### **Hematoxylin and eosin staining**

Epididymal white adipose tissue (epi-WAT) and brown adipose tissue (BAT) were fixed with 10% neutralbuffered formalin, embedded in paraffin, and sectioned. Hematoxylin and eosin (H&E) staining was then performed on these sections.

### **Stem cell s.c. implantation, excision of fat pads, and histology**

The use and care of animals were approved by the Institutional Animal Care and Use Committee. To induce commitment, post-confluent Bcl6 knockdown (Bcl6 KD) C3H10T1/2 and wild type (WT) C3H10T1/2 cells were provided with DMEM containing 10% FBS, 1  $\mu$ M dexamethasone, 0.5 mM 3-isobutyl-1-methylxanthine, 10  $\mu$ g/ml insulin, and 200  $\mu$ M indomethacin for 2 days, then trypsinized and collected. After centrifugation, cell pellets were resuspended in 10% FBS and injected s.c. ( $3 \times 10^7$  cells per site) with a 17-gauge needle at the sternum of Crl:NU/NU-nuBR athymic mice (five animals per group,

10-week-old, male; Charles River Breeding Laboratories). Mice were housed in microisolator cages. At 6 wk the mice were killed by cervical dislocation, and the fat pads derived from the implanted cells and epididymal fat pads were excised and fixed in neutral-buffered formalin. For light microscopy, fat pads derived from implanted stem cells and epididymal fat pads were paraffin-embedded after 24 h of fixation in buffered formalin. Paraffin tissue sections (4  $\mu$ m) were stained with hematoxylin and eosin for histological analysis.

### **Statistical analysis**

Values are expressed as means  $\pm$  SD of at least three independent experiments. Prism was used to evaluate the data for statistical significance by two-tailed Student's t-tests with  $*P < 0.05$  (versus the indicated controls) considered as significant.

## Supplementary material Figures

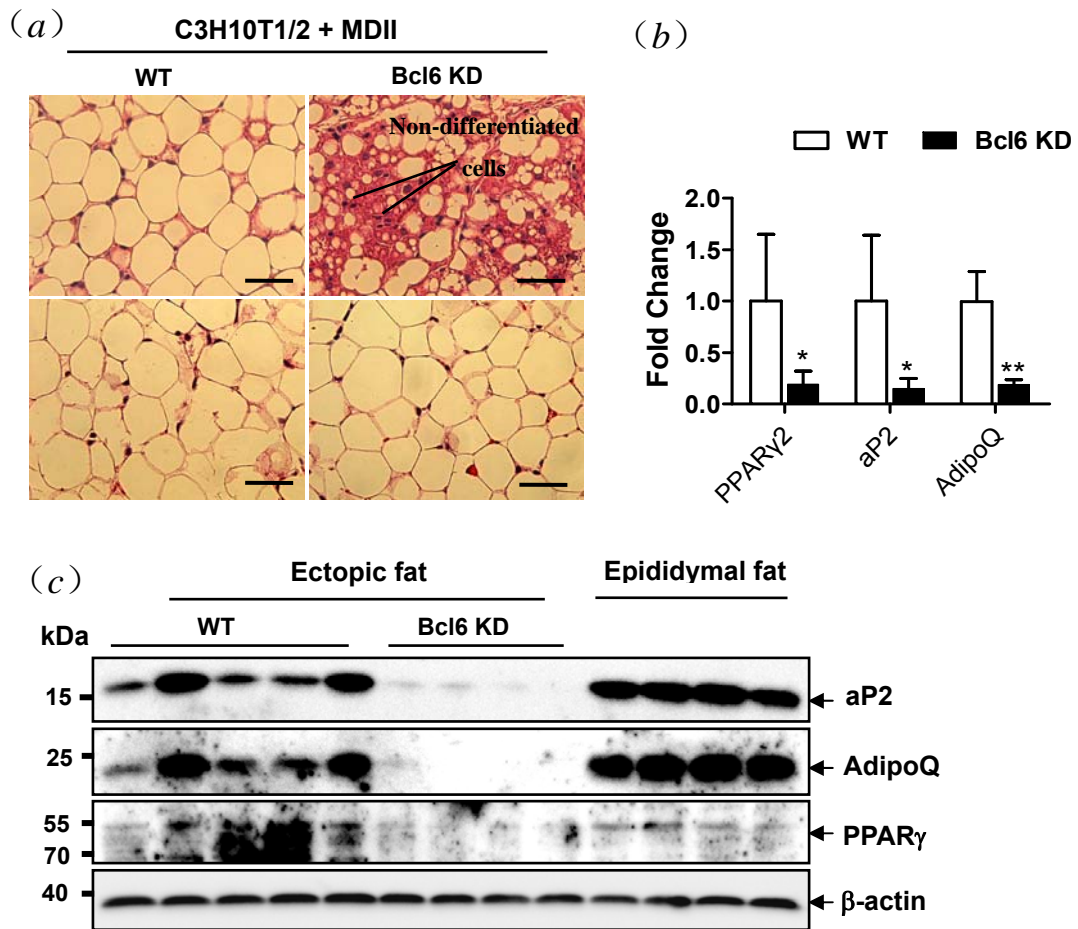

Figure S1. Reduction of Bcl6 inhibits adipogenic potential *ex vivo*. Subconfluent WT and Bcl6-KD C3H10T1/2 stem cells were treated with MDII for 2 days, trypsinized, and resuspended in 10% FBS and injected s.c. ( $3 \times 10^7$  cells per site) with a 17-gauge needle at the sternum of 10-week-old male athymic mice (CrI:NU/NU-nuBR). (a) Fat pads derived from the implanted cells (upper panels) and epididymal fat pads (positive control; lower panels) were excised and fixed in neutral-buffered formalin. Hematoxylin (blue) and Eosin (pink)-stained fat sections from representative samples of mouse Bcl6 knockdown transplants as well as the corresponding control (WT). Scale bar, 50  $\mu$ m. (b) Ectopic fat pads found at the site of injection of WT (n=5) or Bcl6-KD (n=4) C3H10T1/2 cells were rapidly excised from athymic mice used for RNA and protein extracting. The relative expression of adipocyte genes *PPAR $\gamma$ 2*, *aP2* and *AdipoQ* were determined by qPCR. The values are represented as means  $\pm$  SD. \* $P < 0.05$ ; \*\* $P < 0.01$ . (c) Adipocyte markers aP2, AdipoQ and PPAR $\gamma$  protein were determined by Western blot.

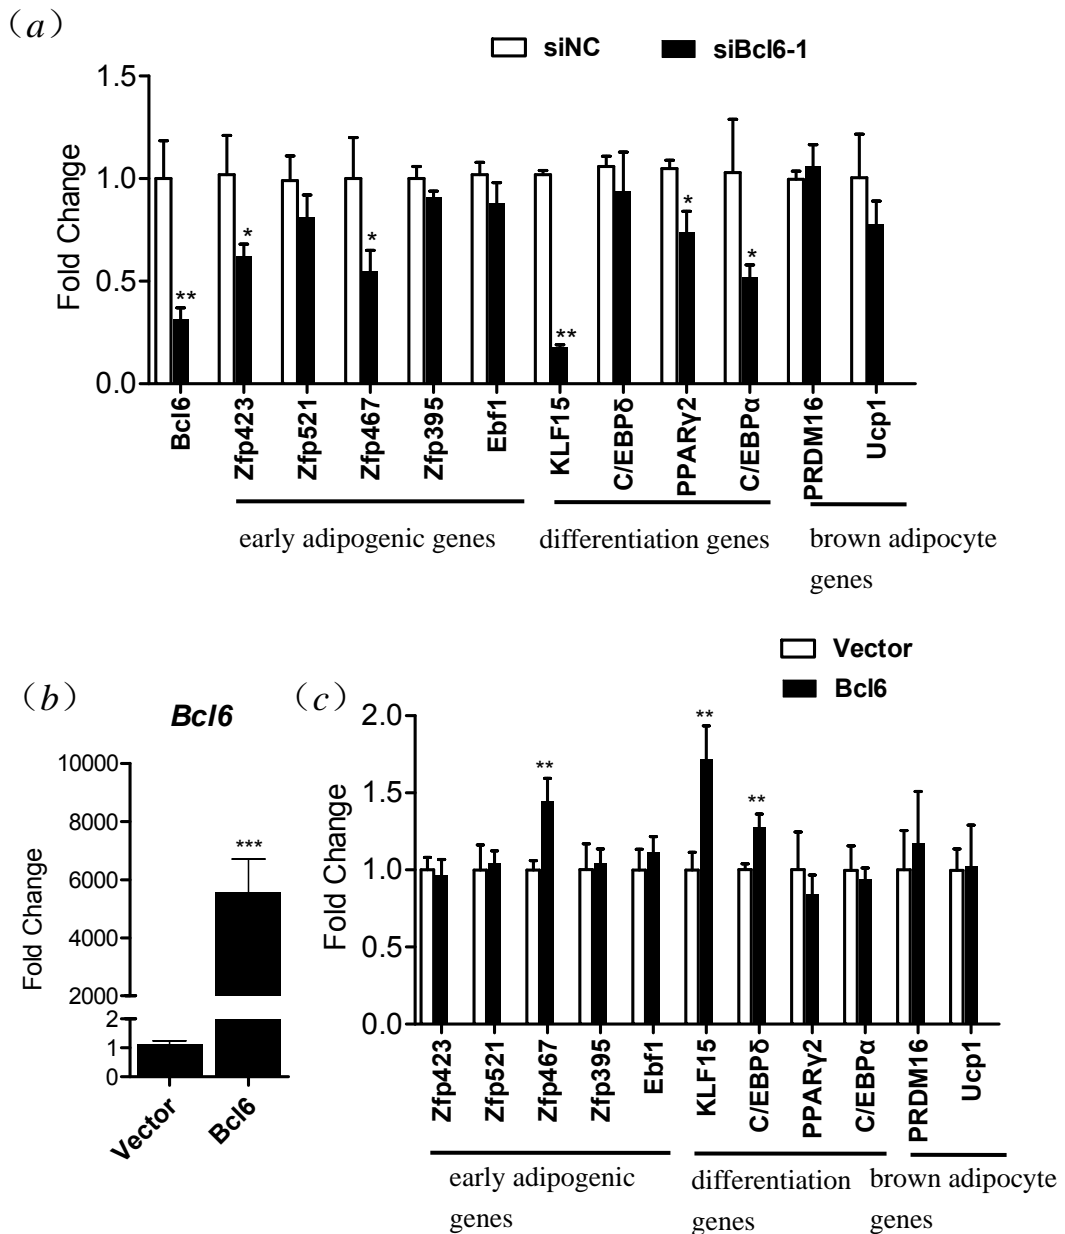

Figure S2. The effect of knockdown or overexpression of *Bcl6* on the mRNA expression of adipogenic genes. (a) The mRNA expression levels of adipogenic genes after transfected siRNA 36h. (b) The *Bcl6* expression after transfected pCDNA3.1-Bcl6 48h. (c) The mRNA expression levels of adipogenic genes after transfected pCDNA3.1-Bcl6 48h. Values are represented as means  $\pm$  SD (n=3). \* $P < 0.05$ , \*\* $P < 0.01$ , \*\*\* $P < 0.001$  vs. siNC or empty vector.

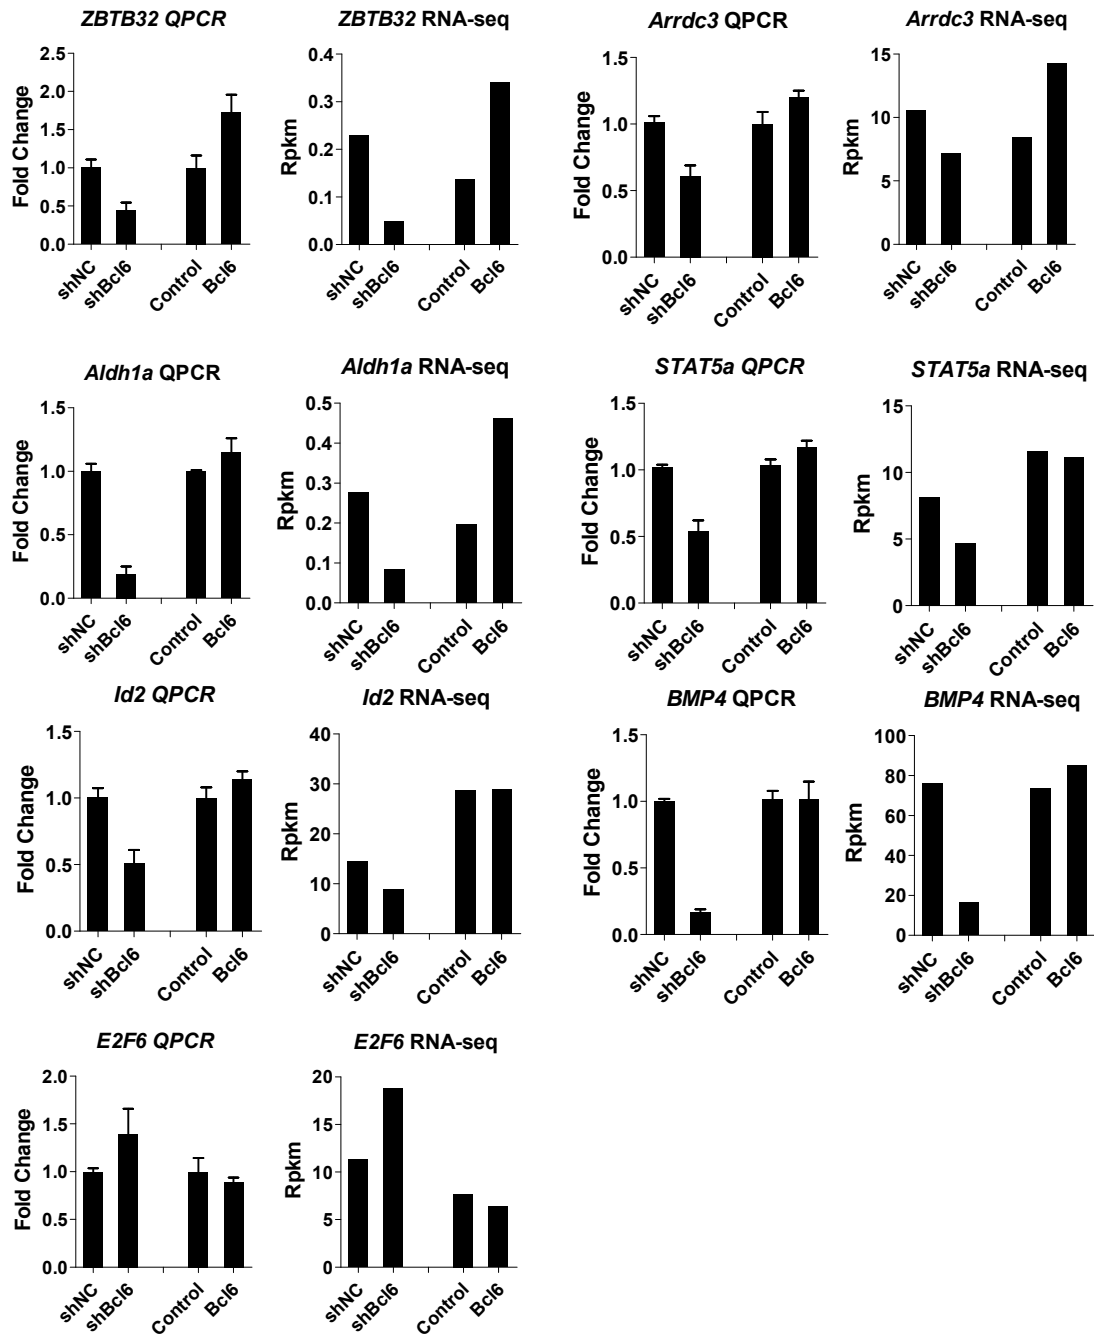

Figure S3. Validation of RNA-Seq-based gene expression. QPCR and RNA-Seq results of the expression mode of seven genes (*ZBTB32*, *Arrdc3*, *Aldh1a*, *STAT5a*, *Id2*, *BMP4* and *E2F6*) during knockdown of *Bcl6* with shRNA and overexpression of *Bcl6*. The values of relative expression levels are represented as means  $\pm$  SD (n=3).

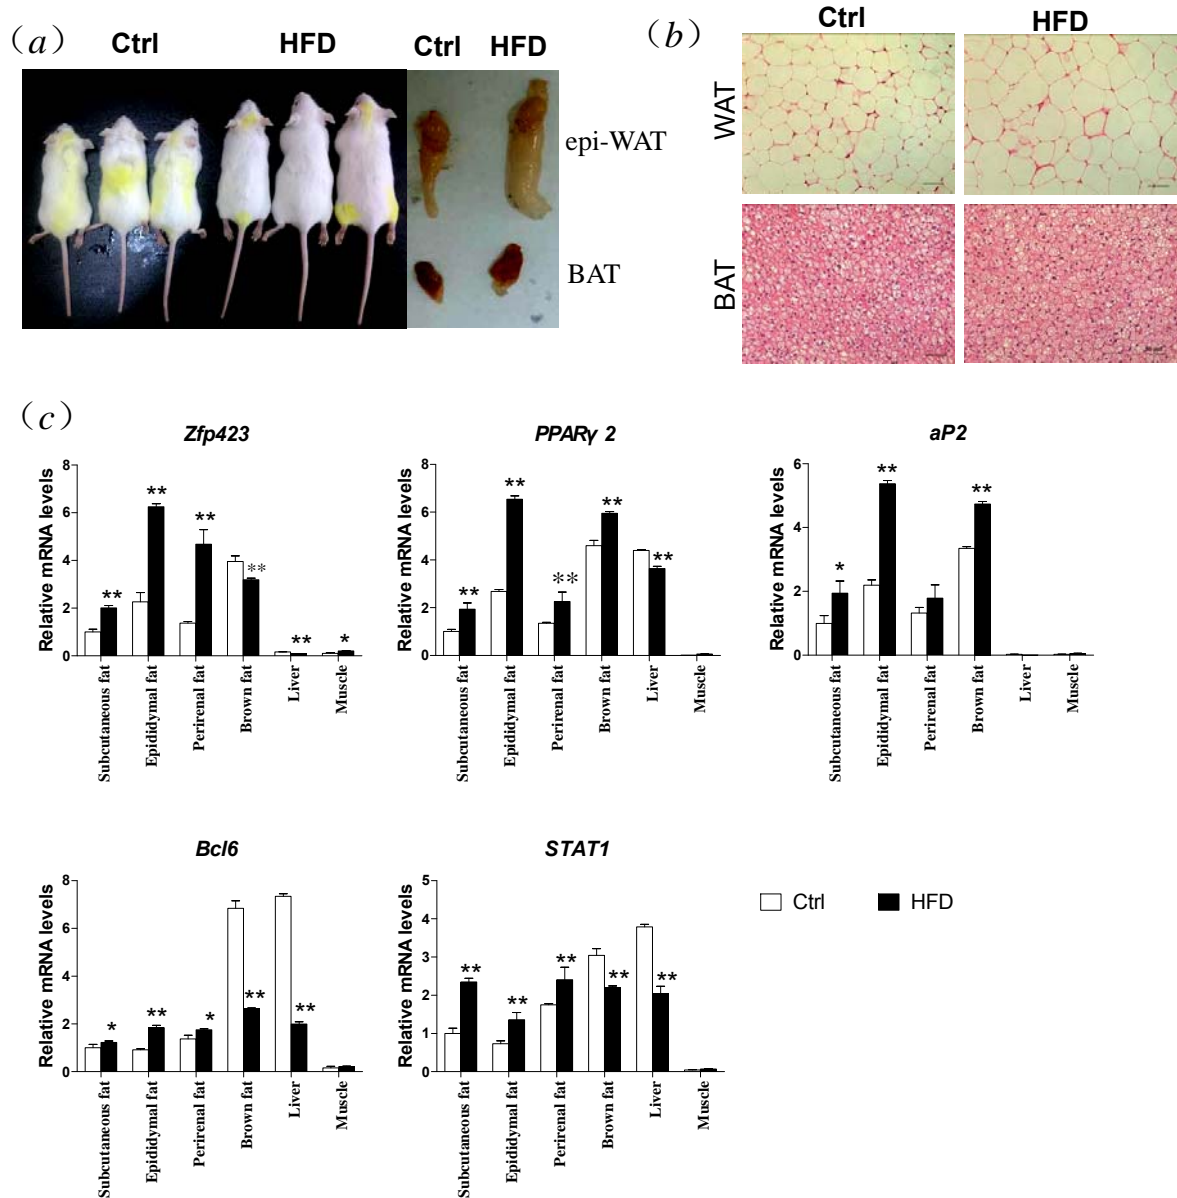

Figure S4. *STAT1* and *Bcl6* expression was coordinate upregulated in the white adipose tissue of HFD-induced obesity mice. After feeded 8 weeks by normal (Ctrl) or high-fat diet (HFD), mice were killed for collecting the subcutaneous, epididymal, perirenal and brown adipose tissue, and liver, muscle (n=5). (a) the mouse body type and fat mass of epididymal and brown fat tissue after 8 wk. (b) The development status of epididymal and brown fat tissue in Ctrl and HFD mice by H&E staining. Scale bar, 50  $\mu$ m. (c) The mRNA expression of adipocyte genes *Zfp423*, *PPAR $\gamma$ 2*, *aP2*, *Bcl6*, and *STAT1* was detected by qPCR at various tissues. Values are represented as means  $\pm$  SD (n=5). \* $P$  < 0.05; \*\* $P$  < 0.01 vs. Ctrl.

## Supplementary material Tables

Table S1 PCR primers for constructing overexpression vector

| Overexpression plasmids | PCR primers 5'-3'                                                                                                                                                      |
|-------------------------|------------------------------------------------------------------------------------------------------------------------------------------------------------------------|
| pCDNA3.1-Bcl6           | Fw:cccAAGCTTGCCATGGCCTCCCCGGCTGACAG<br>Rev:cgGGATCCTCAGCAGGCTTTGGGGAGCTCCG                                                                                             |
| pCDNA3.1-STAT1          | Fw:cccAAGCTTGCCATGTCACAGTGGTTCGAGCTTC<br>Rev:cgGGATCCTTATACTGTGCTCATCATACTGTC                                                                                          |
| pCMV-HA-Bcl6 CDS        | Fw:gaAGATCTTC GCCTCCCCGGCTGACAG<br>Rev:ggGGTACCTCAGCAGGCTTTGGGAAGCTCCG                                                                                                 |
| pCMV-HA-Bcl6 ΔBTB       | Fw:gaAGATCTTCGAAGCAGAAATGGCCCCCTGCACTTAAACC<br>Rev:ggGGTACCTCAGCAGGCTTTGGGAAGCTCCG                                                                                     |
| pCMV-HA-Bcl6 ΔPEST      | Part1 Fw:gaAGATCTTCGCCTCCCCGGCTGACAG<br>Rev:TGCTGCTTCGCTGGGGACTAACCAGACCCTTCCG<br>Part2 Fw:TTAGTCCCCAGCGAAGCAGCAGTGAGAGTCACTCAC<br>Rev:ggGGTACCTCAGCAGGCTTTGGGAAGCTCCG |
| pCMV-HA-Bcl6 ΔZF        | Fw:gaAGATCTTC GCCTCCCCGGCTGACAG<br>Rev:ggGGTACCTCAGGTCCCATTCTCACAGCTAGAATCCG                                                                                           |

fw: forward primer, rev: reverse primer.

Table S2 PCR primers for promoter reporter vector

| Plasmid      | Location    | PCR primers 5'-3'                                                        |
|--------------|-------------|--------------------------------------------------------------------------|
| STAT1/P1     | -2031 ~ +76 | Fw:ggGGTACCAGAAAGTGATTTCCCTCCAGAAAC<br>Rev:ctaGCTAGCCAGGGAGCTTTGACAGACTC |
| STAT1/P2     | -1645 ~ +76 | Fw:ggGGTACCGTTGGTCCTCTGTGATATCTATG<br>Rev:ctaGCTAGCCAGGGAGCTTTGACAGACTC  |
| STAT1/P3     | -1228~ +76  | Fw:ggGGTACCAAGAAAGTGATAGGGAACATGG<br>Rev:ctaGCTAGCCAGGGAGCTTTGACAGACTC   |
| STAT1/P4     | -836 ~ +76  | Fw:ggGGTACCACAGACTCAGTAGATATCCAAGG<br>Rev:ctaGCTAGCCAGGGAGCTTTGACAGACTC  |
| STAT1/P5     | -227 ~ +76  | Fw:ggGGTACCGTACGTGAAGGTTAATCTCTAG<br>Rev:ctaGCTAGCCAGGGAGCTTTGACAGACTC   |
| STAT1/P1 mut |             | Fw:CCATCTGTTTTACACCCACAATTGATTCTC<br>Rev:TGTGGGTGTAACAGATGGAATTTGAATC    |
| STAT1/P1 del |             | Fw:CCATCTGTACAATTGATTCTCTAGGTGTG<br>Rev:GAATCAATTGTAACAGATGGAATTTGAATC   |
| STAT1/P2 mut |             | Fw:GCCCTGGCTGTACTACCACTCACTCTTTAG<br>Rev:GTGGTAGTACAGCCAGGGCTACACTGAGAA  |
| STAT1/P2 del |             | Fw:GTAGCCCTGGCTGCTCACTCTTTAGACTAG<br>Rev:GAGTGAGCAGCCAGGGCTACACTGAGAAAC  |

fw: forward primer, rev: reverse primer, mut: mutation, del: deletion.



Table S3 qPCR primers for gene expression

| Gene            | Forward primer 5'-3'      | Reverse primer 5'-3'      |
|-----------------|---------------------------|---------------------------|
| Bcl6            | AGACGCACAGTGACAAACCATACAA | GCTCCACAAATGTTACAGCGATAGG |
| Pref-1          | CTTTCTCAACAAGTGCGAAACC    | AGTGGTCATGTCAATCTTCTCG    |
| Zfp423          | CAAGAAGTCCAAGGCTGAG       | TTGAGGTCGCACTGATTG        |
| Zfp521          | CTCAGCAGACCTCCGATAT       | GTAAGACCTCCAAGCAATACT     |
| Zfp467          | CTTATGGCTGCGAGGAATG       | GGTGAATCTTCTGGCTGAA       |
| Zfp395          | GGAGATGGACGAGATGATG       | ACGGGAAACAGAGAAGATG       |
| Ebf1            | ACAAGCCACCAATCAAGG        | GAAGGAGAAGATGCCAGAG       |
| KLF15           | GCCTTCTGTTCTCTGCTAC       | CCACTGCTATCTCCAATACC      |
| C/EBP $\delta$  | AAGAGTAAGACCAAGAAGACC     | GCTCCAGGACCTTATGCT        |
| C/EBP $\alpha$  | AGCCAAGAAGTCGGTAGA        | CGGTCATTGTCACTGGTC        |
| PPAR $\gamma$ 2 | TGGGTGAAACTCTGGGAGATTC    | AGAGGTCCACAGAGCTGATTCC    |
| PRDM16          | AGGATTGCGAGCGGATGTT       | GGCGGATGAGGTTGGACTT       |
| UCP1            | GGCTTAATGACTGGAGGTGTG     | TTCTGTGGTGGCTATAACTCTGT   |
| aP2             | GATGCCTTTGTGGGAACCTG      | TCCTGTCTGCTGCGGTGATT      |
| LPL             | TCTCCTGATGACGCTGATTTTG    | TCTCTTGGCTCTGACCTTGTTG    |
| AdipoQ          | CCTCTTAATCCTGCCAGTC       | TCCTGTCTCACCCCTTAGGAC     |
| STAT1           | AGTGGCTGGAAAAGCAAGAC      | ATCCTGGAGATTACGCTTGC      |
| ZBTB32          | TCAGATGGAGACACATTACC      | CGAGGAAGAGTAGAGGAAG       |
| Arrdc3          | AAGTGTGAGCAGTCAGTGTAG     | GATTATTCCGTCTCTGTTCTC     |
| Aldh1a          | CGTGAACCTATTGGAGTGT       | CTCTGCTGGCTTGACAAC        |
| STAT5a          | CAACATCAGCAGCAACCA        | CTTCTTCAGCACCTCCATC       |
| Id2             | CAAGAAGGTGACCAAGATG       | CAAGGACAGGATGCTGAT        |
| BMP4            | ATCACCTCAACTCAACCAA       | CCTCTACCACCATCTCCT        |
| E2F6            | AGAACTCTCCGACCTGTC        | CTTGAATGCCGTGAATATCC      |
| $\beta$ -actin  | GGCACCACACCTTCTACAATG     | GGGGTGTGAAGGTCTCAAAC      |

Table S4 PCR primers for shRNA expression vector

| shRNA plasmids | Sequence 5'-3'                                                                                                                                             |
|----------------|------------------------------------------------------------------------------------------------------------------------------------------------------------|
| pRNAT-shBcl6   | Fw: gatccGCAGACGCACAGTGACAAATTCAAGAGATTTGTCAGTGT<br>GCGTCTGCTTTTTTACGCGTa<br>Rev: agcttACGCGTAAAAAAGCAGACGCACAGTGACAAATCTCTTGA<br>ATTTGTCAGTGTGCGTCTGCg    |
| pRNAT-shNC     | Fw: gatccGTTCTCCGAACGTGTCACGTTTCAAGAGAACGTGACACG<br>TTCGGAGAATTTTTTACGCGTa<br>Rev: agcttACGCGTAAAAAATTCTCCGAACGTGTCACGTTCTCTTGA<br>AACGTGACACGTTTCGGAGAACg |

fw: forward primer, rev: reverse primer.

Table S5 Searching Bcl6 sites in the targets promoter<sup>1</sup>

| Gene symbol | Matrix  | Position    | Strand | Matrix sim. | Sequence          |
|-------------|---------|-------------|--------|-------------|-------------------|
| Stat1       | V\$BCL6 | -2021/-2005 | -      | 0.815       | cagtttcTGGAaggaaa |
|             |         | -1696/-1680 | -      | 0.973       | tgtTTCCttgaaacaga |
|             |         | -1526/-1510 | -      | 0.885       | gagTTCCaggacagcca |
|             |         | -1291/-1275 | -      | 0.819       | ttattctTTGAataagc |
| Nmi         | V\$BCL6 | -2828/-2812 | +      | 0.826       | ctgttcTTGAaaagaa  |
|             |         | -1286/-1270 | -      | 0.91        | ttgTTCCgagaaatcag |
|             |         | -234/-218   | -      | 0.885       | gagTTCCaggacagcca |
| Casz1       | V\$BCL6 | -1515/-1499 | -      | 0.913       | ttaTTCCAagaattaac |
|             |         | -1513/-1497 | +      | 0.828       | taattctTGGAataagg |
|             |         | -1359/-1343 | +      | 0.886       | attTTCCtacaagtgtg |
|             |         | -1279/-1263 | -      | 0.88        | gagTTCCtaaataaaac |
|             |         | -398/-382   | +      | 0.854       | atttcaTTGAaaaagt  |
| Ifi44       | V\$BCL6 | -2569/-2553 | +      | 0.886       | cagTTCCaggagacatt |
|             |         | -703/-687   | -      | 0.885       | gagTTCCaggacagcca |
|             |         | -113/-97    | +      | 0.882       | tgctTCCtaaatttcc  |
| Ifih1       | V\$BCL6 | -2330/-2314 | +      | 0.968       | tttTTCCttgaggggg  |
|             |         | -2295/-2279 | +      | 0.813       | agagtctTAGAaaacgt |
|             |         | -1114/-1098 | -      | 0.875       | ggattctTTGAaaacag |
| Ifit1       | V\$BCL6 | -692/-676   | +      | 0.815       | tgattggTGGAaagaac |

<sup>1</sup>Identifying the binding sites of Bcl6 in the targets promoter by MatInspector program available at <http://www.genomatix.de/matinspector.html>. The promoter sequence of the targets were obtained from genome database (<http://asia.ensembl.org/index.html>). The 3000 bp upstream of the first exon (in which the first base was defined as +1) of the genes used to search Bcl6 binding sites with a fixed matrix threshold of 0.8.

Table S6 Searching STAT1 sites in the promoter of well-characterized pro-adipogenic genes<sup>1</sup>

| Gene symbol    | Matrix   | Position    | Strand | Matrix sim. | Sequence            |
|----------------|----------|-------------|--------|-------------|---------------------|
| Zfp423         | V\$STAT1 | -124/-106   | +      | 0.771       | aaaaatccgGCAAggggcg |
| Zfp467         | V\$STAT1 | -2180/-2162 | +      | 0.851       | attctccctGGAAacaggc |
|                |          | -1568/-1550 | +      | 0.883       | aaggatccaGGAAGatggg |
| Zfp395         | V\$STAT1 | -744/-726   | +      | 0.821       | ttaattccaGAAAcagtaa |
|                |          | -2829/-2811 | -      | 0.782       | ggctgtcctGGAActcact |
| Ebf1           | V\$STAT1 | -2032/-2014 | -      | 0.885       | tgggtcccaGGAAGcccta |
| KLF15          | V\$STAT1 | -372/-354   | -      | 0.782       | ttactcacgGGAAtggacg |
| KLF4           | V\$STAT1 | -1485/-1467 | -      | 0.772       | ttgagtcccGGAAtccttg |
| C/EBP $\delta$ | V\$STAT1 | -1640/-1622 | +      | 0.862       | acggtgctaGGAAGgtcc  |
|                |          | -2242/-2224 | +      | 0.858       | tgaatgctaGGAAGtttta |
| C/EBP $\alpha$ | V\$STAT1 | -2990/-2972 | +      | 0.787       | gccgctcctGGAAGaggaa |
| PPAR $\gamma$  | V\$STAT1 | -468/-450   | +      | 0.862       | gcacatctaGGAaaaaaac |
|                |          | -1476/-1458 | -      | 0.782       | ggctgtcctGGAActcact |
|                |          | -2669/-2651 | -      | 0.853       | tgaatgctaGGAActgggc |

<sup>1</sup>Identifying the binding sites of STAT1 in the promoter of well-characterized pro-adipogenic genes by MatInspector program available at <http://www.genomatix.de/matinspector.html>. The promoter sequence of the pro-adipogenic genes were obtained from genome database (<http://asia.ensembl.org/index.html>). The 3000 bp upstream of the first exon (in which the first base was defined as +1) of the genes used to search STAT1 binding sites with a default program.
